# Supplementary material for: Fe–Ni–Co trimetallic oxide hierarchical nanospheres as high-performance bifunctional electrocatalysts for water electrolysis
Source: Royal Society of Chemistry journal article supplement (doi:10.1039/d2nj01762h), 2022-01-01
Supplement: d2nj01762h1.pdf [file d2nj01762h1.pdf]

Supplementary Material for

# **Fe-Ni-Co trimetallic oxides hierarchical nanosphere as high-performance bifunctional Electrocatalysts for Water electrolysis**

*Wenqing Zheng,<sup>✉a</sup> Xinzhi Ma,<sup>✉b</sup> Han Sun,<sup>a</sup> Xinpeng Li,<sup>a</sup> Yu Zhang,<sup>a</sup> Zhuoxun Yin,<sup>\*a</sup> Wei Chen,<sup>\*a</sup> Yang*

*Zhou<sup>\*c</sup>*

*a College of Chemistry and Chemical Engineering, Qiqihar University, Qiqihar 161006, China. E-mail: yzx@qqhru.edu.cn;*

*b Ministry of Education and School of Physics and Electronic Engineering, Harbin Normal University, Harbin 150025, China. E-mail: maxz@hrbnu.edu.cn*

*c College of Science, Qiqihar University, Qiqihar 161006, China. E-mail: 373133430@qq.com;*

*\* Corresponding author.*

*E-mail addresses: yzx@qqhru.edu.cn*

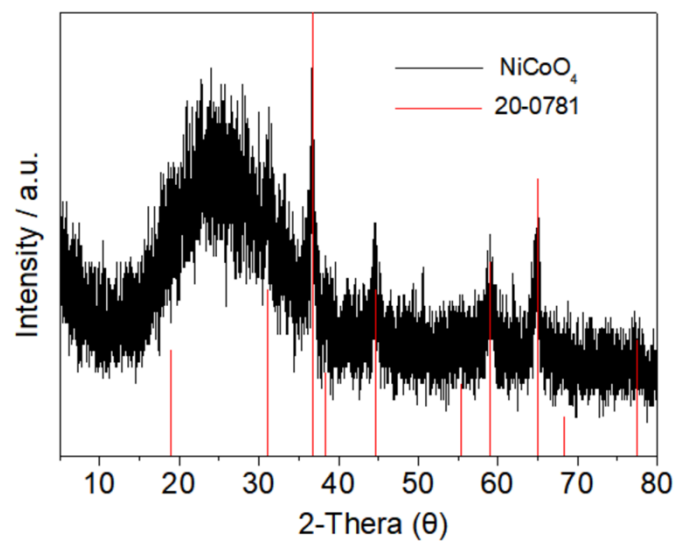

**Fig. S1** XRD pattern of NiCoO<sub>4</sub>.

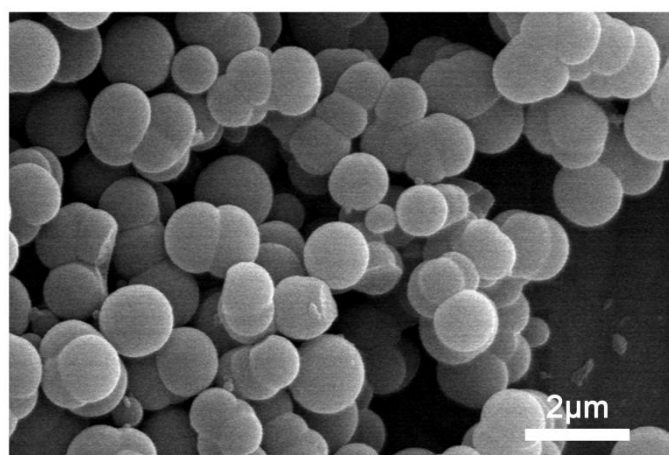

**Fig. S2** The SEM image of NiCo precursor nanosphere.

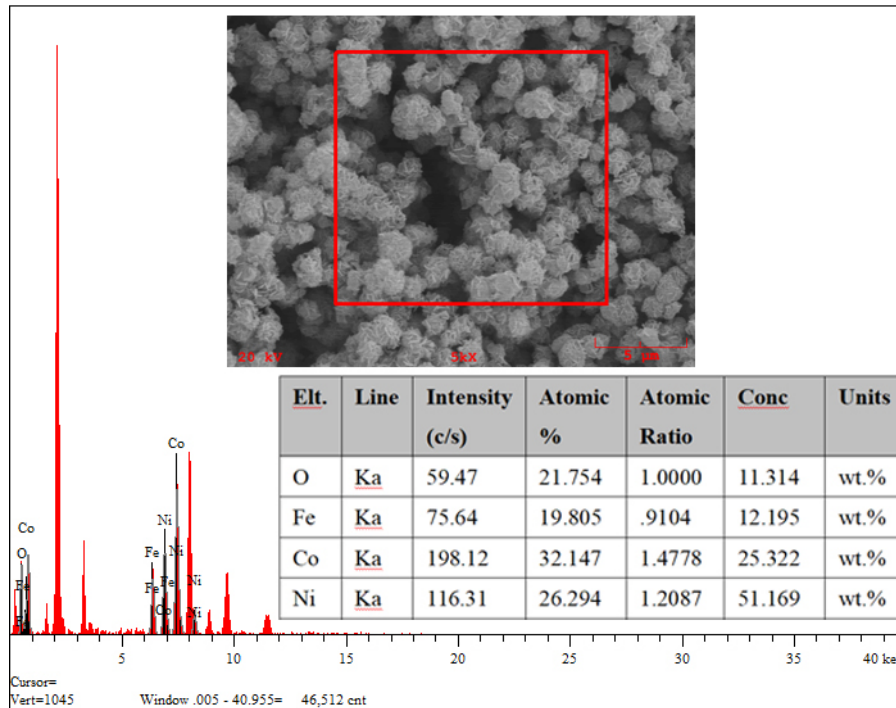

**Fig. S3** The half-quantitative SEM energy dispersive X-ray spectrum (SEM-EDX) of FeNiCo-15.

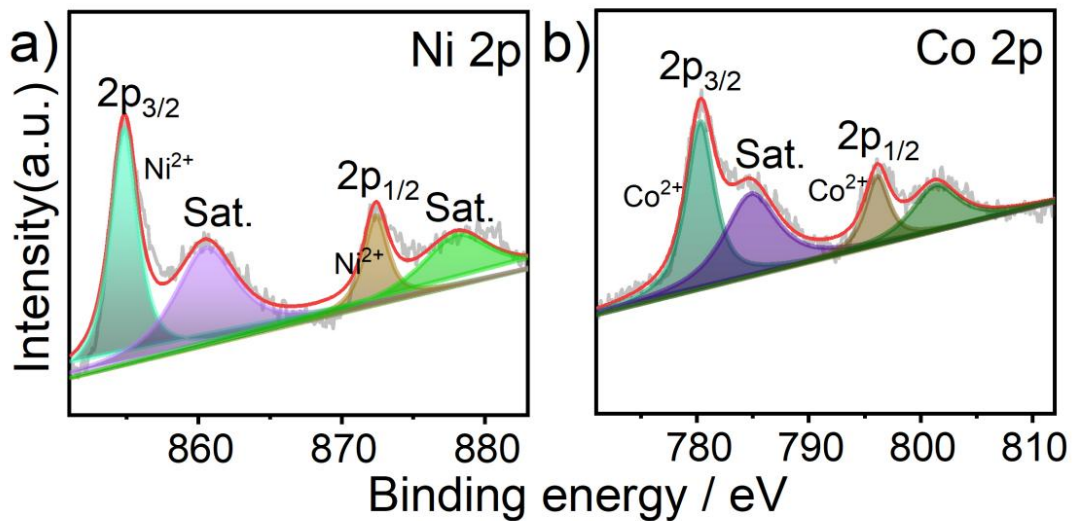

**Fig. S4** a) Ni 2p, b) Co 2p XPS spectra of NiCo precursor.

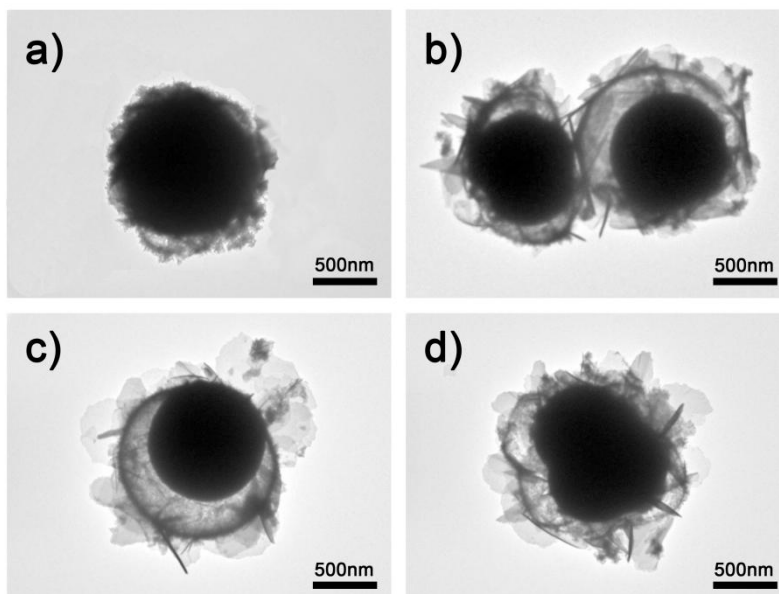

**Fig. S5** The TEM images of **a)** NiCo, **b)** FeNiCo-10, **c)** FeNiCo-15 and **d)** FeNiCo-20.

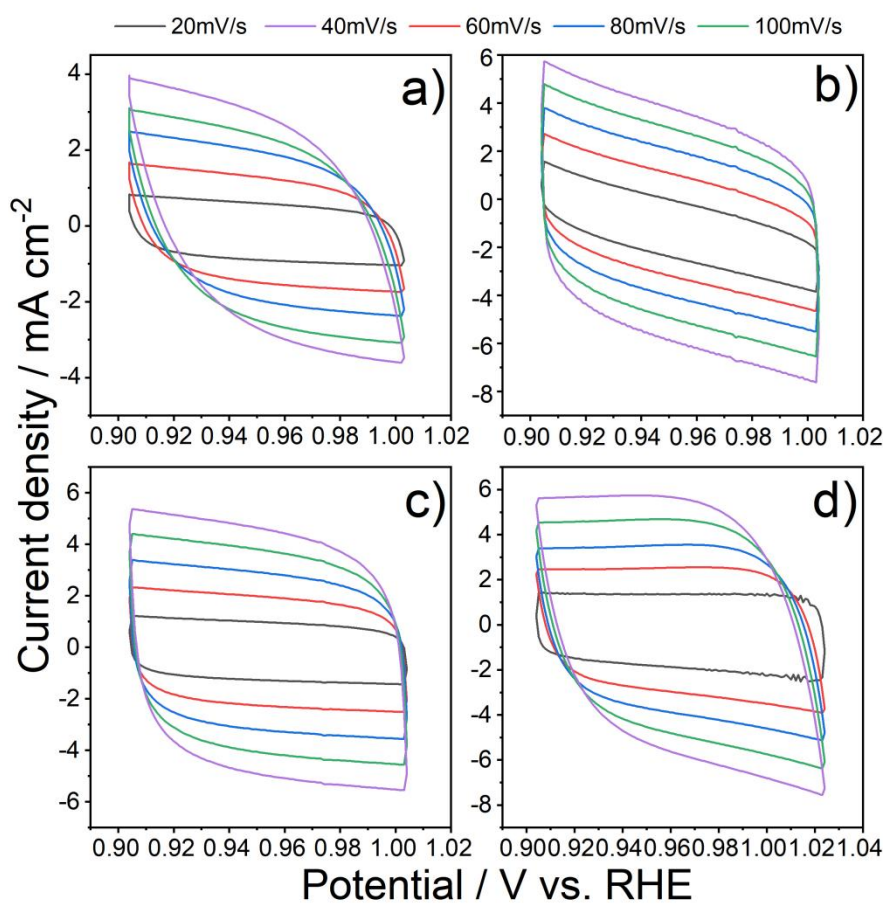

**Fig. S6** The cyclic voltammograms curves of catalytic **a)** NiCo, **b)** FeNiCo-10, **c)** FeNiCo-15 and **d)** FeNiCo-20 toward to OER.

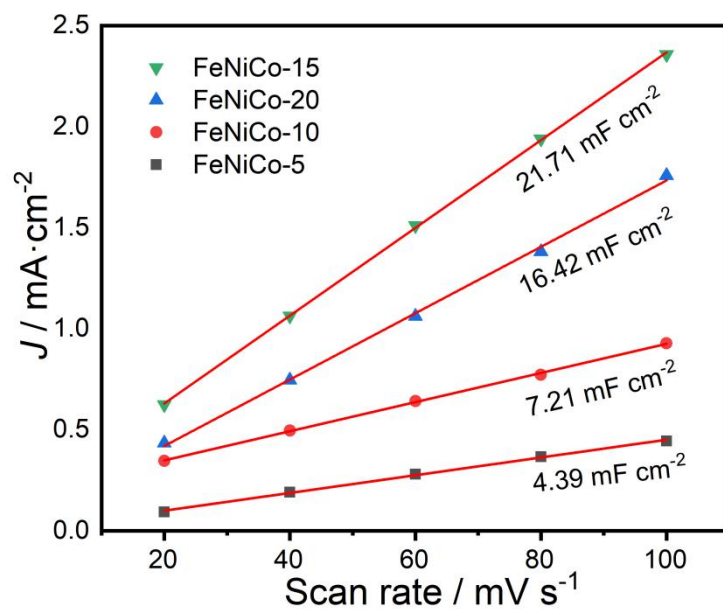

**Fig. S7** Cat for FeNiCo-5, FeNiCo-10, FeNiCo-15 and FeNiCo-20 toward to OER.

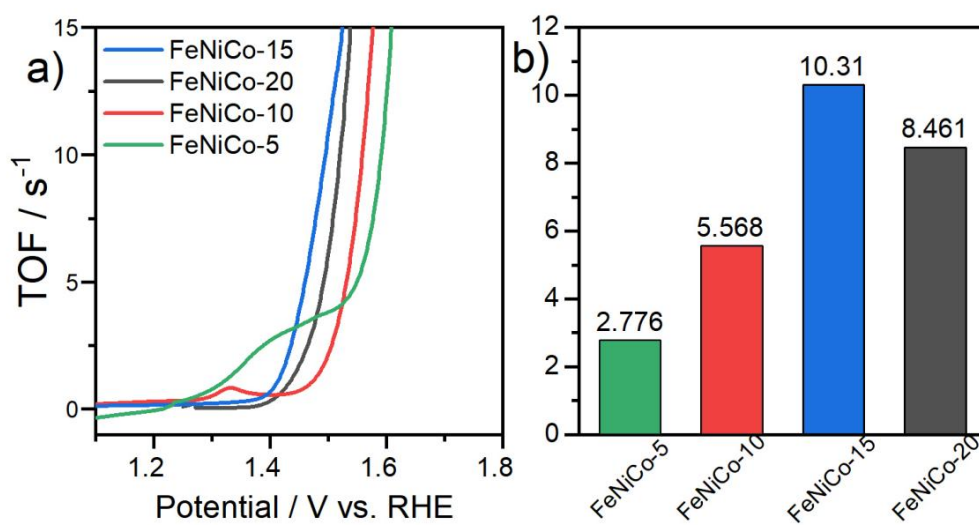

**Fig. S8 a)** The TOF curve of FeNiCo-15, FeNiCo-20, FeNiCo-10 and FeNiCo-5, **b)**

TOF at 350 mV toward to OER.

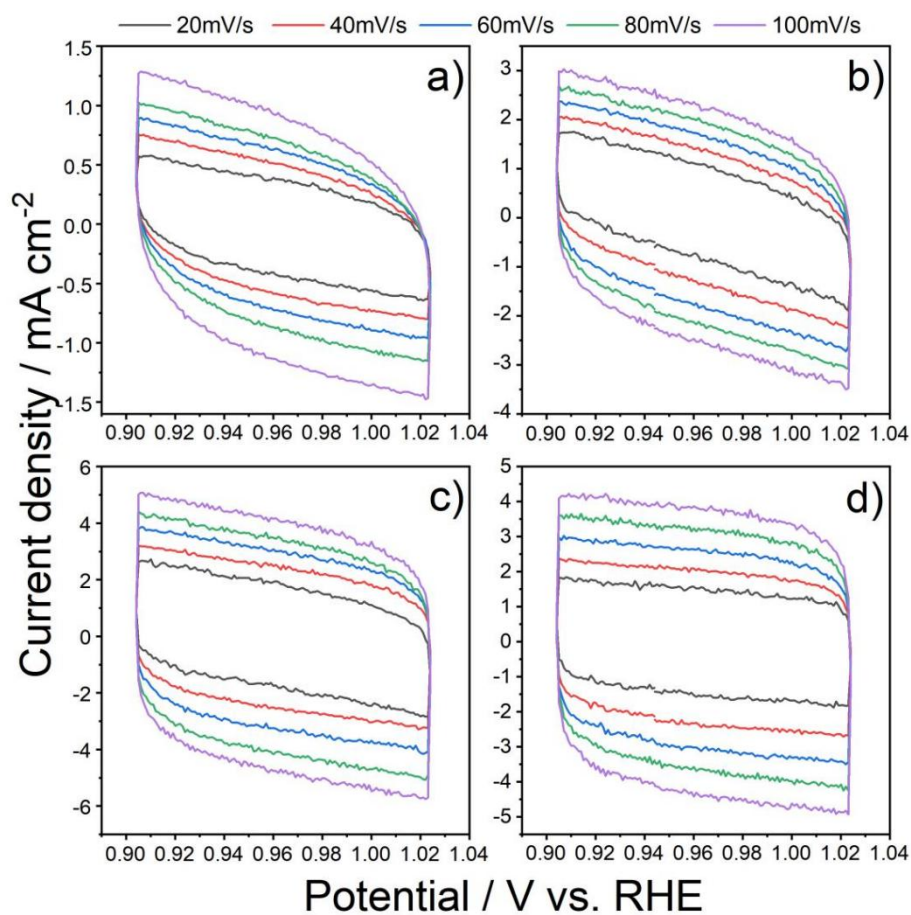

**Fig. S9** The cyclic voltammograms curves of catalytic **a)** NiCo, **b)** FeNiCo-10, **c)** FeNiCo-15 and **d)** FeNiCo-20 toward to HER.

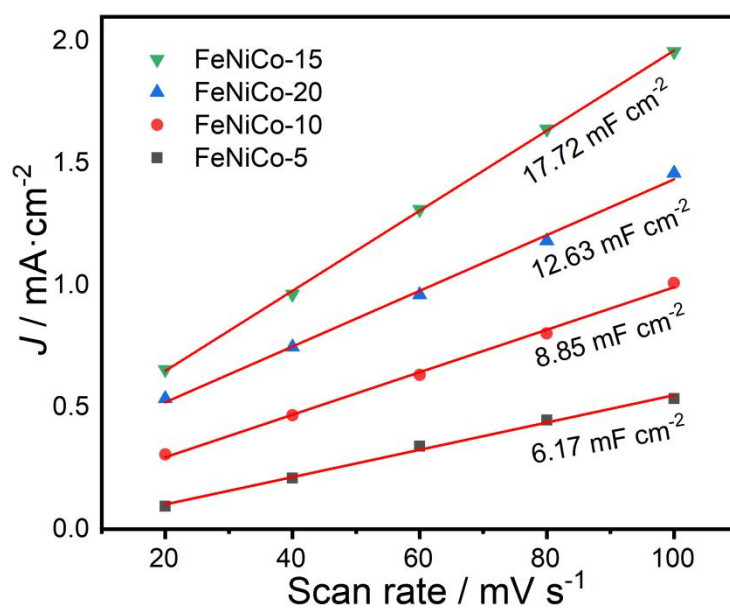

**Fig. S10**  $C_{dl}$  for FeNiCo-5, FeNiCo-10, FeNiCo-15 and FeNiCo-20 toward to HER.

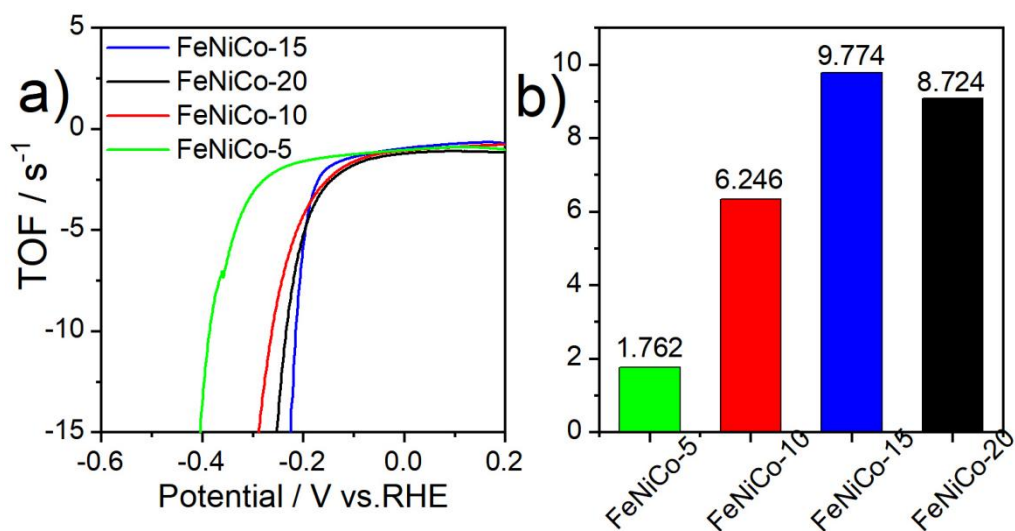

**Fig. S11** a) The TOF curve of FeNiCo-15, FeNiCo-20, FeNiCo-10 and FeNiCo-5, b) TOF at 350 mV toward to HER.

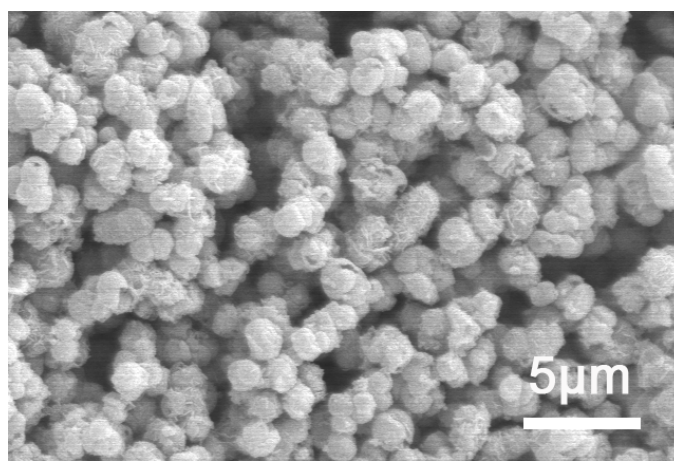

**Fig. S12** SEM images of FeNiCo-15 after electrochemical test.

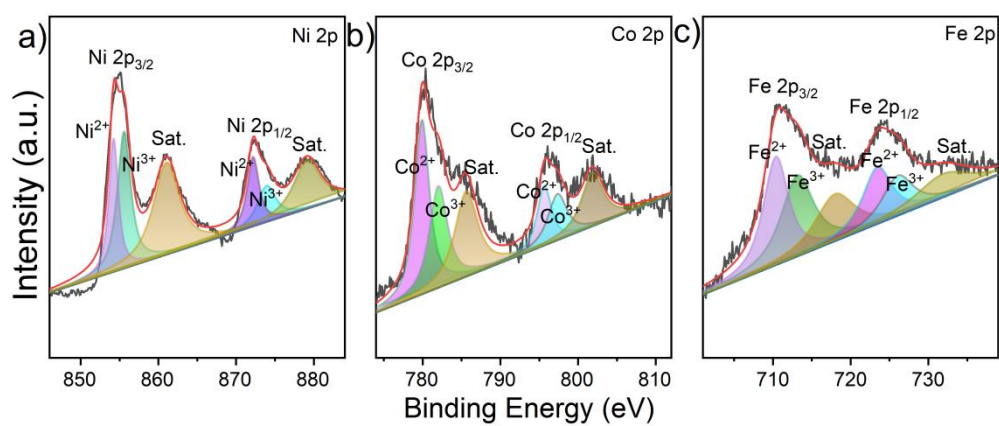

**Fig. S13** The XPS spectrum of Fe<sup>3+</sup>-NiCo<sub>2</sub>O<sub>4</sub> nanospheres catalyst after OER

**Table S1.** The detailed parameters of NiCo, FeNiCo-5, FeNiCo-10, FeNiCo-15, FeNiCo-20 and IrO<sub>2</sub> toward the OER.

|                                            | NiCo                        | FeNiCo-5                    | FeNiCo-10                   | FeNiCo-15                    | FeNiCo-20                    | IrO <sub>2</sub> |
|--------------------------------------------|-----------------------------|-----------------------------|-----------------------------|------------------------------|------------------------------|------------------|
| Atom ratio                                 | 1/1                         | Fe:Co:Ni=<br>6:45:49        | Fe:Co:Ni=<br>12:42:46       | Fe:Co:Ni=<br>22:37:42        | Fe:Co:Ni=<br>32:32:36        |                  |
| Overpotential<br>at 10 mA cm <sup>-2</sup> | 373 mV                      | 303 mV                      | 263 mV                      | 204 mV                       | 216 mV                       | 271 mV           |
| anodic peak<br>position                    | 1.41 V vs.<br>RHE           | --                          | --                          | --                           | --                           | --               |
| Rct                                        | 1.5 Ω cm <sup>2</sup>       | 1.4 Ω cm <sup>2</sup>       | 1.4 Ω cm <sup>2</sup>       | 1.2 Ω cm <sup>2</sup>        | 1.3 Ω cm <sup>2</sup>        | --               |
| Cdl                                        | 3.62 mF<br>cm <sup>-2</sup> | 4.39 mF<br>cm <sup>-2</sup> | 7.21 mF<br>cm <sup>-2</sup> | 21.71 mF<br>cm <sup>-2</sup> | 16.42 mF<br>cm <sup>-2</sup> | --               |
| TOF(350<br>mV)                             | --                          | 2.776 s <sup>-1</sup>       | 5.568 s <sup>-1</sup>       | 10.31 s <sup>-1</sup>        | 8.461 s <sup>-1</sup>        | --               |

**Table S2.** The detailed parameters of NiCo, FeNiCo-5, FeNiCo-10, FeNiCo-15, FeNiCo-20 and Pt/C toward the HER.

|                                            | NiCo                        | FeNiCo-5                    | FeNiCo-10                   | FeNiCo-15                    | FeNiCo-20                    | Pt/C  |
|--------------------------------------------|-----------------------------|-----------------------------|-----------------------------|------------------------------|------------------------------|-------|
| Overpotential<br>at 10 mA cm <sup>-2</sup> | 306 mV                      | 289 mV                      | 262 mV                      | 178 mV                       | 205 mV                       | 16 mV |
| anodic peak<br>position                    | 1.41 V vs.<br>RHE           | --                          | --                          | --                           | --                           | --    |
| Rct                                        | 1.7 Ω cm <sup>2</sup>       | 1.6 Ω cm <sup>2</sup>       | 1.4 Ω cm <sup>2</sup>       | 1.1 Ω cm <sup>2</sup>        | 1.2 Ω cm <sup>2</sup>        | --    |
| Cdl                                        | 4.04 mF<br>cm <sup>-2</sup> | 6.17 mF<br>cm <sup>-2</sup> | 8.85 mF<br>cm <sup>-2</sup> | 17.72 mF<br>cm <sup>-2</sup> | 12.63 mF<br>cm <sup>-2</sup> | --    |
| TOF(350<br>mV)                             | --                          | 1.762 s <sup>-1</sup>       | 6.246 s <sup>-1</sup>       | 9.774 s <sup>-1</sup>        | 8.724 s <sup>-1</sup>        | --    |



**Table S3.** The comparisons of the catalytic activities of OER and HER on FeNiCo-15 with the recently reported catalysts in 1.0 M KOH media.

| Catalysts                                                        | Overpotential at 10 mA cm <sup>-2</sup> for OER(mV vs RHE) | Overpotential at 10 mA cm <sup>-2</sup> for HER(mV vs RHE) | Electrolyte concentration (pH) | Ref.      |
|------------------------------------------------------------------|------------------------------------------------------------|------------------------------------------------------------|--------------------------------|-----------|
| FeNiCo-15                                                        | 204                                                        | 178                                                        | 14                             | This work |
| NiCo                                                             | 373                                                        | 306                                                        |                                |           |
| Ni/NiO@G-SH                                                      | 270                                                        | ----                                                       | 14                             | 7         |
| Ni/Ni(OH) <sub>2</sub>                                           | 310                                                        | 168                                                        | 14                             | 8         |
| 1-D CoHCF /CFP                                                   | 420                                                        | ----                                                       | 14                             | 11        |
| NiC <sub>0.2</sub> NS/Ni/CF                                      | 228                                                        | 121                                                        | 14                             | 12        |
| NCO-0.1                                                          | 297                                                        | 143                                                        | 14                             | 14        |
| NiFe-PBA                                                         | 263                                                        | 169                                                        | 14                             | 15        |
| NiCo <sub>2</sub> O <sub>4</sub>                                 | 420                                                        | ----                                                       | 14                             | 16        |
| FeP                                                              | ---                                                        | 69                                                         | 0                              | 22        |
| Fe-NiMoO <sub>4</sub>                                            | 217                                                        | 217                                                        | 14                             | 25        |
| Ni-Fe-S                                                          | 223                                                        | 115                                                        | 14                             | 26        |
| CoM-P-3DHFLMs                                                    | 292                                                        | ----                                                       | 14                             | 33        |
| Ni <sub>4</sub> Cu <sub>2</sub> @C                               | 280                                                        | 137                                                        | 14                             | 34        |
| ECT-S-Co <sub>0.37</sub> Ni <sub>0.26</sub> Fe <sub>0.37</sub> O | 232                                                        | ----                                                       | 14                             | 37        |
| FeNi <sub>3</sub> N-Ni <sub>3</sub> S                            | 230                                                        | 181                                                        | 14                             | 38        |
| Co@NCNTAs                                                        | 280                                                        | ----                                                       | 14                             | 39        |
| Co-Fe-P-Se                                                       | 270                                                        | ----                                                       | 14                             | 41        |
